# Supplementary material for: An unprecedented switching of the second-order nonlinear optical response in aggregate bis(salicylaldiminato)zinc(ii) Schiff-base complexes
Source: Royal Society of Chemistry journal article supplement (doi:10.1039/c2dt30702b), 2012-01-01
Supplement: c2dt30702b.pdf [file c2dt30702b.pdf]

## Electronic Supplementary Information

# An unprecedented switching of the second-order nonlinear optical response in aggregate bis(salicylaldiminato)zinc(II) Schiff-base complexes

Santo Di Bella,<sup>\*a</sup> Ivan Pietro Oliveri,<sup>a</sup> Alessia Colombo,<sup>b</sup> Claudia Dragonetti,<sup>b</sup>  
Stefania Righetto<sup>b</sup> and Dominique Roberto<sup>\*b,c</sup>

<sup>a</sup>Dipartimento di Scienze Chimiche, Università di Catania, I-95125 Catania, Italy. E-mail: [sdibella@unict.it](mailto:sdibella@unict.it)

<sup>b</sup>Dipartimento CIMA "Lamberto Malatesta" dell'Università degli Studi di Milano, UdR dell'INSTM and <sup>c</sup>ISTM-CNR, I-20133 Milano, Italy.  
E-mail: [dominique.roberto@unimi.it](mailto:dominique.roberto@unimi.it)

### Contents

|                                            |           |
|--------------------------------------------|-----------|
| <b>1. Characterization of the adduct 2</b> |           |
| 1.1. <sup>1</sup> H NMR studies.....       | S2        |
| 1.2. UV/vis spectra .....                  | S3        |
| 1.3. Job's plot analysis .....             | S4        |
| <b>2. Characterization of the adduct 3</b> |           |
| 2.1. <sup>1</sup> H NMR studies.....       | S5        |
| 2.2. UV/vis spectra .....                  | S6        |
| 2.3. Job's plot analysis .....             | S7        |
| <b>3. References .....</b>                 | <b>S8</b> |

## 1. Characterization of the adduct **2**

### 1.1. $^1\text{H}$ NMR studies

The formation of the adduct **2** was investigated by  $^1\text{H}$  NMR studies. In particular, the addition of an equimolar amount of pyridine to a  $\text{CD}_2\text{Cl}_2$  solution of **1** involves a down-field shift of  $\text{H}_1$ ,  $\text{H}_3$  and the  $\text{OCH}_2$ - signals, indicative of the deaggregation of the  $\text{Zn}^{\text{II}}$  complex and formation of the adduct **2**.<sup>1</sup> Moreover, the observed up-field shift of the ortho-hydrogen atoms of the pyridine clearly indicates its axial coordination to the complex (Fig. S1).<sup>2</sup>

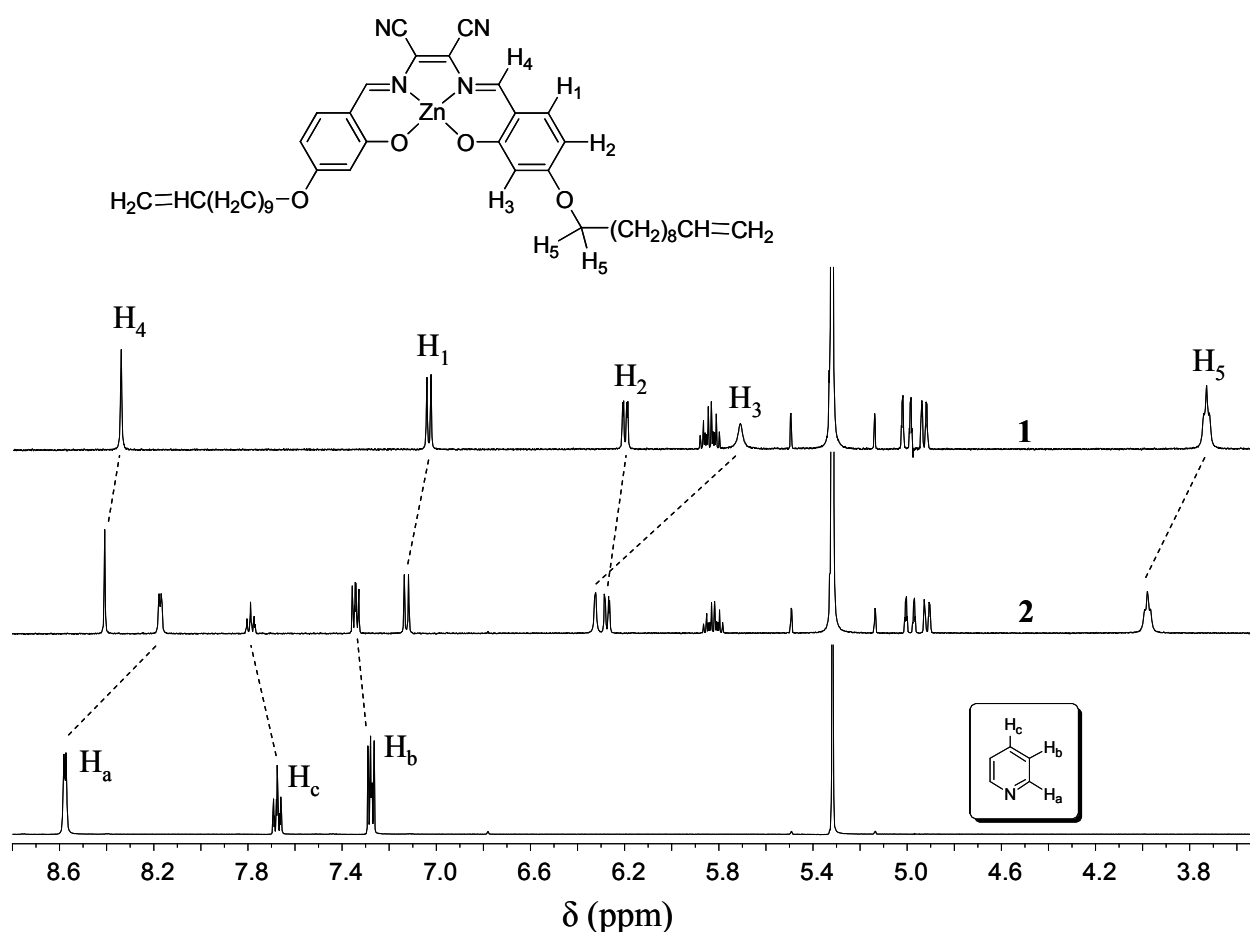

**Fig. S1.**  $^1\text{H}$  NMR spectra of **1** ( $3.0 \times 10^{-4}$  M) in  $\text{CD}_2\text{Cl}_2$  and upon addition of an equimolar amount of pyridine, with formation of the adduct **2**. The  $^1\text{H}$  NMR spectrum of pyridine in  $\text{CD}_2\text{Cl}_2$  (bottom) is reported as reference.

## 1.2. UV/vis spectra

The addition of 1.2-fold molar amount of pyridine to a DCM solution of **1** involves the deaggregation of the complex and formation of a new band at 555 nm (Fig. S2). Under these conditions this represents the saturation point (no changes of the absorption spectrum are observed by further addition of pyridine) and is indicative of the formation of the adduct **2**.<sup>1</sup>

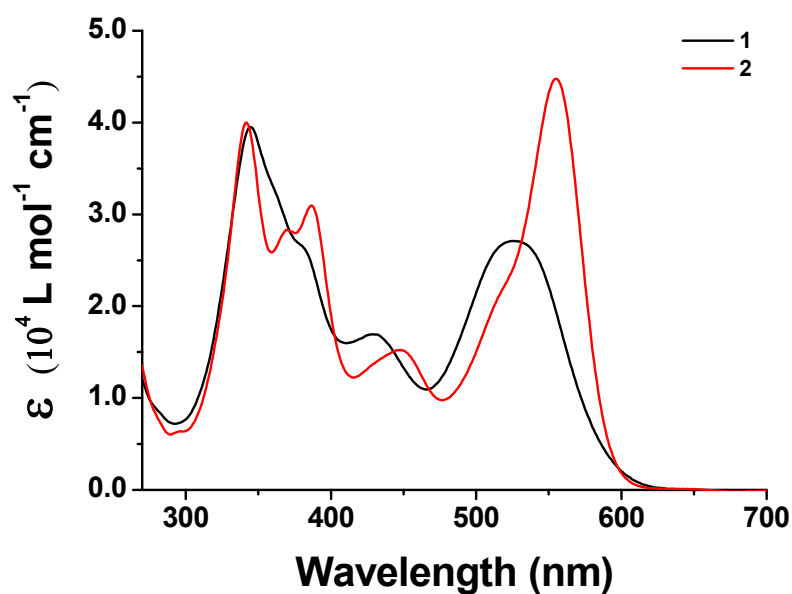

**Fig. S2.** UV/vis absorption spectra of **1** ( $3.0 \times 10^{-4}$  M) in DCM solution, before (—) and after (—) the addition of 1.2-fold molar amount of pyridine.

### 1.3. Job's plot analysis

To determine the binding stoichiometry between the complex **1** and the pyridine, the continuous variation method<sup>3</sup> with absorption data was used. Job's plot analysis (Fig. S3) clearly indicates the formation of a 1:1 adduct.

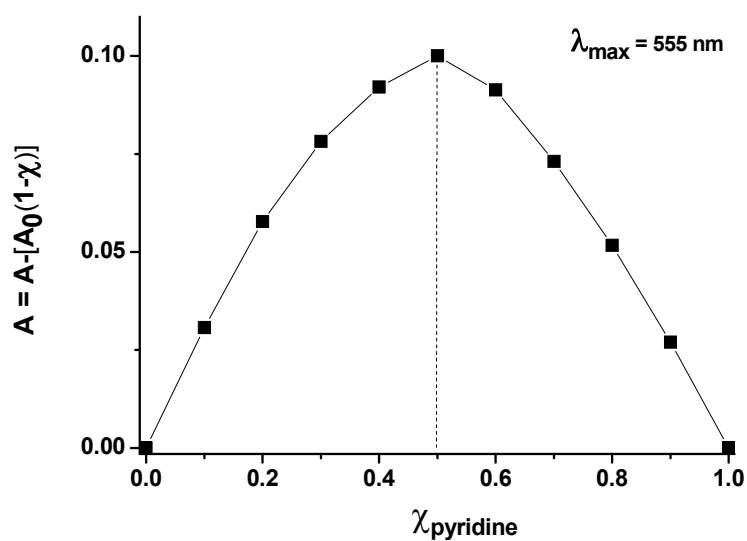

**Fig. S3.** Job's plot for the binding of **1** with pyridine in DCM. The total concentration of **1** and pyridine is  $10 \mu\text{M}$ .  $A$  and  $A_0$  (the initial absorbance of **1**) are the absorbances at 555 nm.

## 2. Characterization of the adduct **3**

### 2.1. $^1\text{H}$ NMR studies

The formation of the adduct **3** was investigated by  $^1\text{H}$  NMR studies. In particular, the addition of half molar amount of dpe to a  $\text{CD}_2\text{Cl}_2$  solution of **1** involves a down-field shift of  $\text{H}_1$ ,  $\text{H}_3$  and the  $\text{OCH}_2$ - signals, indicative of the deaggregation of the  $\text{Zn}^{\text{II}}$  complex and formation of the adduct **3**.<sup>1b</sup> Moreover, the observed up-field shift of the ortho-hydrogen atoms of the dpe clearly indicates its axial coordination to the complex (Fig. S4).

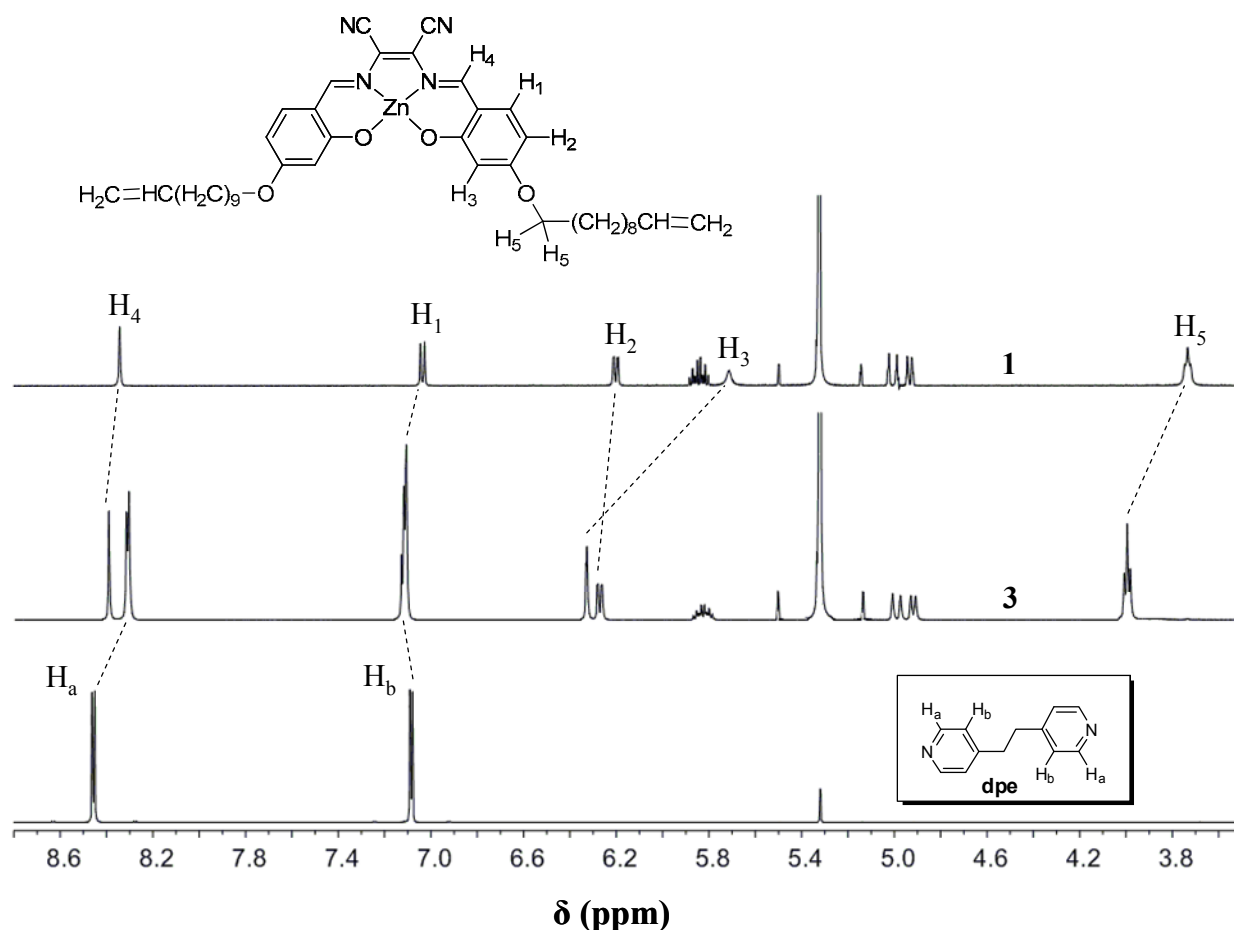

**Fig. S4.**  $^1\text{H}$  NMR spectra of **1** ( $3.0 \times 10^{-4}$  M) in  $\text{CD}_2\text{Cl}_2$  and upon addition of half molar amount of dpe, with formation of the adduct **3**. The  $^1\text{H}$  NMR spectrum of dpe in  $\text{CD}_2\text{Cl}_2$  (bottom) is reported as reference.

## 2.2. UV/vis spectra

The addition of 0.6-fold molar amount of dpe to a DCM solution of **1** involves the deaggregation of the complex and formation of a new band at 554 nm (Fig. S5). Under these conditions this represents the saturation point (no changes of the absorption spectrum are observed by further addition of dpe) and is indicative of the formation of the adduct **3**.<sup>1b</sup>

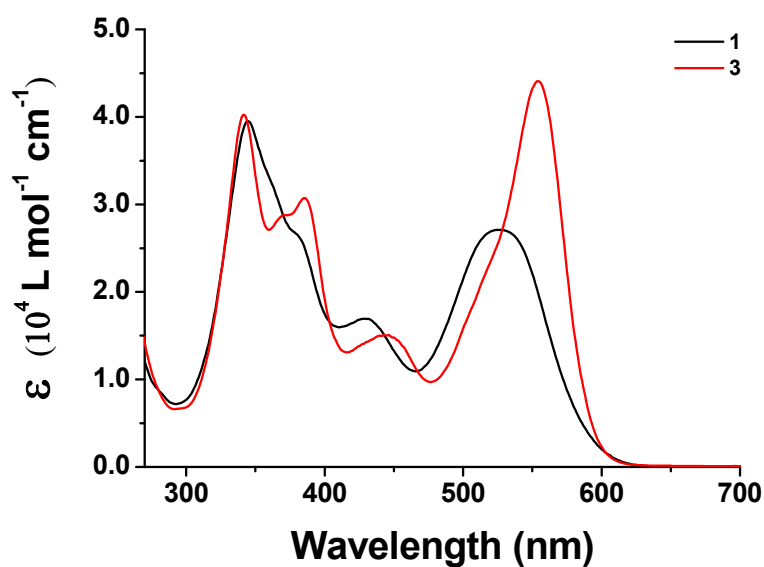

**Fig. S5.** UV/vis absorption spectra of **1** ( $3.0 \times 10^{-4}$  M) in DCM solution, before (—) and after (—) the addition of 0.6-fold molar amount of dpe.

### 2.3. Job's plot analysis

To determine the binding stoichiometry between the complex **1** and the dpe, the continuous variation method<sup>3</sup> with absorption data was used. Job's plot analysis (Fig. S6) clearly indicates the formation of a 2:1 adduct.

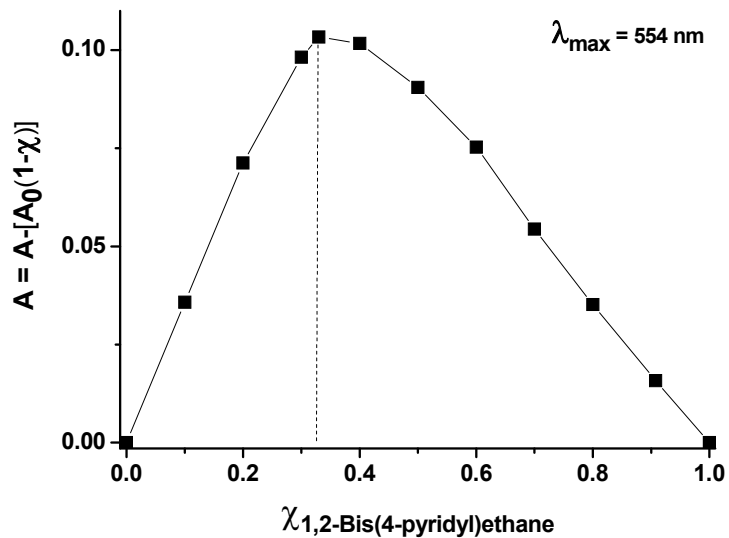

**Fig. S6.** Job's plot for the binding of **1** with dpe in DCM. The total concentration of **1** and dpe is 10  $\mu\text{M}$ .  $A$  and  $A_0$  (the initial absorbance of **1**) are the absorbances at 554 nm.

### 3. References

- 1 (a) G. Consiglio, S. Failla, I. P. Oliveri, R. Purrello and S. Di Bella, *Dalton Trans.*, 2009, 10426; (b) G. Consiglio, S. Failla, P. Finocchiaro, I. P. Oliveri, R. Purrello and S. Di Bella, *Inorg. Chem.*, 2010, **49**, 5134.
- 2 E. C. Escudero-Adán, J. Benet-Buchholz and A. W. Kleij, *Inorg. Chem.*, 2008, **47**, 4256.
- 3 (a) P. Job, *Ann. Chem.*, 1928, **9**, 113; (b) V. M. S. Gil and N. C. Oliveira, *J. Chem. Educ.*, 1990, **67**, 473.
